# Supplementary material for: An Integrative Nutritional Model for Predicting Postoperative Complications in Locally Advanced Gastric Cancer After Radical Surgery and P-HIPEC
Source: Research Square preprint supplement (doi:10.21203/rs.3.rs-7112941/v1), 2025-08-27
Supplement: Supplementary file 1 [file 10669da672c93c1200ffd7d2.docx]

Supplementary table 2. Clinical and pathological characteristics between training set and validation set.

| Characteristic | Total  (n=875) | training set  (n=613) | validation set  (n=262) | P value |
| --- | --- | --- | --- | --- |
| POCs, n (%)  Y / N | 217 (24.8) / 658 (75.2) | 153 (25.0) / 460 (75.0) | 64 (24.4) / 198 (75.6) | 0.868 |
| Sex, n (%)  Male / Female | 644 (73.6) / 231 (26.4) | 446 (72.8) / 167 (27.2) | 198 (75.6) / 64 (24.4) | 0.387 |
| Age (years), n (%)  ≤ 60 / > 60 | 288 (32.9) / 587 (67.1) | 195 (31.8) / 418 (68.2) | 93 (35.5) / 169 (64.5) | 0.288 |
| BMI (kg/m2), n (%)  <18.5   18.5-24.9  ≥ 25 | 50 (5.7)  566 (64.7)  259 (29.6) | 35 (5.7)  403 (65.7)  175 (28.5) | 15 (5.7)  163 (62.2)  84 (32.1) | 0.572 |
| Smoking, n (%)  Y / N | 462 (52.8) / 413 (47.2) | 328 (53.5) / 285 (46.5) | 134 (51.1) / 128 (48.9) | 0.521 |
| Alcohol, n (%)  Y / N | 341 (38.5) / 534 (61.5) | 245 (40.0) / 368 (60.0) | 96 (36.6) / 166 (63.4) | 0.355 |
| NRS-2002, n (%)  < 3 / ≥ 3 | 373 (42.6) / 502 (57.4) | 269 (43.9) / 344 (56.1) | 104 (39.7) / 158 (60.3) | 0.251 |
| Hypertension, n (%)  Y / N | 267 (30.5) / 608 (69.5) | 185 (30.2) / 428 (69.8) | 82 (31.3) / 180 (68.7) | 0.742 |
| Diabetes, n (%)  Y / N | 120 (13.7) / 755 (86.3) | 89 (14.5) / 524 (85.5) | 31 (11.8) / 231 (88.2) | 0.290 |
| Cardia-cerebrovascular disease, n (%)  Y / N | 304 (34.7) / 571 (65.3) | 210 (34.3) / 403 (65.7) | 94 (35.9) / 168 (64.1) | 0.645 |
| Respiratory disease1, n (%)  Y / N | 286 (32.7) / 589 (67.3) | 200 (32.6) / 413 (67.4) | 86 (32.8) / 176 (67.2) | 0.954 |
| Neoadjuvant chemotherapy, n (%)  Y / N | 113 (12.9) / 762 (87.1) | 78 (12.7) / 535 (87.3) | 35 (13.4) / 227 (86.6) | 0.798 |
| Pyloric obstruction, n (%)  Y / N | 215 (24.6) / 660 (75.4) | 151 (24.6) / 462 (75.4) | 64 (24.4) / 198 (75.6) | 0.948 |
| Abdominal operation history, n (%)  Y / N | 103 (11.8) / 772 (88.2) | 71 (11.6) / 542 (88.4) | 32 (12.2) / 230 (87.8) | 0.791 |
| Preoperative ASA score, n (%)  I-II / III | 628 (71.8) / 247 (28.2) | 447 (72.9) / 166 (27.1) | 181 (69.1) / 81 (30.9) | 0.248 |
| Times of p-HIPEC, n (%)  2 / 3 | 651 (74.4) / 224 (25.6) | 464 (75.7) / 149 (24.3) | 187 (71.4) / 75 (28.6) | 0.180 |
| Digestive tract reconstruction, n (%)  Esophagogastric anastomosis  Esophagojejunostomy  Gastrojejunum Billroth II  Gastrojejunum Roux-en-Y | 29 (3.3)  229 (26.2)  363 (41.5)  254 (29.0) | 19 (3.1)  158 (25.8)  258 (42.1)  178 (29.0) | 10 (3.8)  71 (27.1)  105 (40.1)  76 (29.0) | 0.899 |
| Operative approach, n (%)  Open  Laparoscopic  Robotic | 83 (9.5)  697 (79.7)  95 (10.9) | 53 (8.6)  489 (79.8)  71 (11.6) | 30 (11.5)  208 (79.4)  24 (9.2) | 0.284 |
| Operative duration (min), n (%)  < 200 / ≥ 200 | 394 (45.0) / 481 (55.0) | 276 (45.0) / 337 (55.0) | 118 (45.0) / 144 (55.0) | 0.997 |
| Intraoperative blood loss (ml), n (%)  < 150 / ≥ 150 | 667 (76.2) / 208 (23.8) | 469 (76.5) / 144 (23.5) | 198 (75.6) / 64 (24.4) | 0.766 |
| Postoperative ICU admission, n (%)  Y / N | 152 (17.4) / 723 (82.6) | 99 (16.2) / 514 (83.8) | 53 (20.2) / 209 (79.8) | 0.145 |
| Tumor location, n (%)  Upper  Middle  Lower  Multiple parts | 36 (4.1)  176 (20.1)  570 (65.1)  93 (10.7) | 25 (4.1)  125 (20.4)  400 (65.3)  63 (10.3) | 11 (4.2)  51 (19.5)  170 (64.9)  30 (11.5) | 0.955 |
| Tumor size (cm), n (%)  < 6.45 / ≥ 6.45 | 638 (72.9) / 237 (27.1) | 447 (72.9) / 166 (27.1) | 191 (72.9) / 71 (27.1) | 0.995 |
| T stage, n (%)  T3 / T4 | 249 (28.5) / 626 (71.5) | 175 (28.5) / 438 (71.5) | 74 (28.2) / 188 (71.8) | 0.927 |
| N stage, n (%)  N0  N1  N2  N3 | 37 (4.2)  157 (17.9)  275 (31.4)  406 (46.4) | 23 (3.8)  113 (18.4)  198 (32.3)  279 (45.5) | 14 (5.3)  44 (16.8)  77 (29.4)  127 (48.5) | 0.529 |
| LVI, n (%)  Y / N | 611 (69.8) / 264 (30.2) | 421 (68.7) / 192 (31.3) | 190 (72.5) / 72 (27.5) | 0.257 |
| Nerve invasion, n (%)  Y / N | 758 (86.6) / 117 (13.4) | 534 (87.1) / 79 (12.9) | 224 (85.5) / 38 (14.5) | 0.520 |
| CEA (ng/ml), n (%)  < 3.00 / ≥ 3.00 | 545 (62.3) / 330 (37.7) | 382 (62.3) / 231 (37.7) | 163 (62.2) / 99 (37.8) | 0.977 |
| AFP (ng/ml), n (%)  < 3.50 / ≥ 3.50 | 523 (59.8) / 352 (40.2) | 368 (60.0) / 245 (40.0) | 155 (59.2) / 107 (40.8) | 0.810 |
| CA199 (U/ml), n (%)  < 6.50 / ≥ 6.50 | 225 (25.7) / 650 (74.3) | 160 (26.1) / 453 (73.9) | 65 (24.8) / 197 (75.2) | 0.689 |

Y, Yes; N, No; BMI, body mass index; ICU, intensive care unit; LVI, lymphovascular invasion; NRS-2002, nutrition risk screening 2002; NED, neuroendocrine differentiation; POCs, postoperative complications; p-HIPEC, prophylactic hyperthermic intraperitoneal chemotherapy; T2-DM, type 2 diabetes mellitus.

* P<0.05 was considered significant.
