# Supplementary material for: An Integrative Nutritional Model for Predicting Postoperative Complications in Locally Advanced Gastric Cancer After Radical Surgery and P-HIPEC
Source: Research Square preprint supplement (doi:10.21203/rs.3.rs-7112941/v1), 2025-08-27
Supplement: Supplementary file 2 [file 50e43af27203ea0d3c1c6128.docx]

TABLE 3. Inflammatory nutrition markers and body composition parameters of the training set and validation set.

| Characteristic | | Training set (n=613) | | P value | validation set (n=262) | | P value |
| --- | --- | --- | --- | --- | --- | --- | --- |
| Complication  (n=153) | Without complication  (n=460) | Complication  (n=64) | Without complication  (n=198) |
| High-PLR | Y **/** N | 49 (32.0) **/** 104 (68.0) | 89 (19.3) **/** 371 (80.7) | 0.001* | 23 (35.9) **/** 41 (64.1) | 37 (18.7) **/** 161 (81.3) | 0.004* |
| High-NLR | Y **/** N | 60 (39.2) **/** 93 (60.8) | 114 (24.8) **/** 346 (75.2) | 0.001* | 27 (42.2) **/** 37 (57.8) | 51 (25.8) **/** 147 (74.2) | 0.012* |
| High-IBI | Y **/** N | 92 (60.1) **/** 61 (39.9) | 249 (54.1) **/** 211 (45.9) | 0.196 | 39 (60.9) **/** 25 (39.1) | 106 (53.5) **/** 92 (46.5) | 0.300 |
| High-SIRI | Y **/** N | 107 (69.9) **/** 46 (30.1) | 139 (30.2) **/** 321 (69.8) | <0.001* | 35 (54.7) **/** 29 (45.3) | 63 (31.8) **/** 135 (68.2) | 0.001* |
| High-SII | Y **/** N | 95 (62.1) / 58 (37.9) | 226 (49.1) **/** 234 (50.9) | 0.005* | 41 (64.1) **/** 23 (35.9) | 93 (47.0) **/** 105 (53.0) | 0.017* |
| High-PNI | Y **/** N | 30 (19.6) **/** 123 (80.4) | 217 (47.2) **/** 243 (52.8) | <0.001* | 18 (28.1) **/** 46 (71.9) | 86 (43.4) **/** 112 (56.6) | 0.030* |
| Low-SMI | Y **/** N | 107 (69.9) **/** 46 (30.1) | 137 (29.8) **/** 323 (70.2) | <0.001* | 43 (67.2) **/** 21 (32.8) | 56 (28.3) **/** 142 (71.7) | <0.001* |
| Low-VATI | Y **/** N | 73 (47.7) **/** 80 (52.3) | 288 (62.6) **/** 172 (37.4) | 0.001* | 24 (37.5) **/** 40 (62.5) | 112 (56.6) **/** 86 (43.4) | 0.008* |
| Low-SATI | Y **/** N | 89 (58.2) **/** 64 (41.8) | 261 (56.7) **/** 199 (43.3) | 0.757 | 37 (57.8) **/** 27 (42.2) | 106 (53.5) **/** 92 (46.5) | 0.550 |
| Low-TATI | Y **/** N | 80 (52.3) **/** 73 (47.7) | 279 (60.7) **/** 181 (39.3) | 0.069 | 36 (56.3) **/** 28 (43.8) | 107 (54.0) **/** 91 (46.0) | 0.758 |
| Low-SMD | Y **/** N | 73 (47.7) **/** 80 (52.3) | 172 (37.4) **/** 288 (62.6) | 0.024* | 34 (53.1) **/** 30 (46.9) | 74 (37.4) **/** 124 (62.6) | 0.026* |
| Low-SD | Y **/** N | 68 (44.4) **/** 85 (55.6) | 225 (48.9) **/** 235 (51.1) | 0.338 | 27 (42.2) **/** 37 (57.8) | 86 (43.4) **/** 112 (56.5) | 0.861 |
| Low-VD | Y **/** N | 85 (55.6) **/** 68 (44.4) | 254 (55.2) **/** 206 (44.8) | 0.942 | 36 (56.3) **/** 28 (43.8) | 102 (51.5) **/** 96 (48.5) | 0.510 |
| High-IMAC | Y **/** N | 68 (44.4) **/** 85 (55.6) | 175 (38.0) **/** 285 (62.0) | 0.161 | 30 (46.9) **/** 34 (53.1) | 81 (40.9) **/** 117 (59.1) | 0.401 |
| High-VSR | Y **/** N | 112 (73.2) **/** 41 (26.8) | 210 (45.7) **/** 250 (54.3) | <0.001* | 50 (78.1) **/** 14 (21.9) | 81 (40.9) **/** 117 (59.1) | <0.001* |

Y, Yes; N, No; PLR, platelet-to-lymphocyte ratio; NLR, neutrophil-to-lymphocyte ratio; IBI, inflammatory burden index; SIRI, systemic inflamm-

ation response index; SII，systemic immune-inflammation index; PNI，prognostic nutritional index; SMI, skeletal muscle index; VATI, visceral

adipose tissue index；SATI, subcutaneous adipose tissue index；TATI, total adipose tissue index; SMD, skeletal muscle density; SD, subcutaneous

adipose density；VD, visceral adipose density；IMAC, intramuscular adipose tissue content; VSR, visceral to subcutaneous adipose tissue area ratio.

* P<0.05 was considered significant.
