# Supplementary material for: An Integrative Nutritional Model for Predicting Postoperative Complications in Locally Advanced Gastric Cancer After Radical Surgery and P-HIPEC
Source: Research Square preprint supplement (doi:10.21203/rs.3.rs-7112941/v1), 2025-08-27
Supplement: Supplementary file 3 [file 50fe1aa1fb30a6ef17b4d3e1.docx]

Supplementary table 3. Comparison of the inflammatory nutrition indicators and body composition parameters between training set and validation set.

| Variables | | Total  (n=875) | training set  (n=613) | validation set  (n=262) | P value |
| --- | --- | --- | --- | --- | --- |
| High-PLR | Y **/** N | 198 (22.6) / 677 (77.4) | 138 (22.5) / 475 (77.5) | 60 (22.9) / 202 (77.1) | 0.900 |
| High-NLR | Y **/** N | 252 (28.8) / 623 (71.2) | 174 (28.4) / 439 (71.6) | 78 (29.8) / 184 (70.2) | 0.678 |
| High-IBI | Y **/** N | 486 (55.5) / 389 (44.5) | 341 (55.6) / 272 (44.4) | 145 (55.3) / 117 (44.7) | 0.938 |
| High-SIRI | Y **/** N | 344 (39.3) / 531 (60.7) | 246 (40.1) / 367 (59.9) | 98 (37.4) / 164 (62.6) | 0.450 |
| High-SII | Y **/** N | 455 (52.0) / 420 (48.0) | 321 (52.4) / 292 (47.6) | 134 (51.1) / 128 (48.9) | 0.741 |
| High-PNI | Y **/** N | 351 (40.1) / 524 (59.9) | 247 (40.3) / 366 (59.7) | 104 (39.7) / 158 (60.3) | 0.868 |
| Low-SMI | Y **/** N | 343 (39.2) / 532 (60.8) | 244 (39.8) / 369 (60.2) | 99 (37.8) / 163 (62.2) | 0.575 |
| Low-VATI | Y **/** N | 497 (56.8) / 378 (43.2) | 361 (58.9) / 252 (41.1) | 136 (51.9) / 126 (48.1) | 0.056 |
| Low-SATI | Y **/** N | 494 (56.5) / 381 (43.5) | 351 (57.3) / 262 (42.7) | 143 (54.6) / 119 (45.4) | 0.464 |
| Low-TATI | Y **/** N | 503 (57.5) / 372 (42.5) | 360 (58.7) / 253 (41.3) | 143 (54.6) / 119 (45.4) | 0.256 |
| Low-SMD | Y **/** N | 353 (40.3) / 522 (59.7) | 245 (40.0) / 368 (60.0) | 108 (41.2) / 154 (58.8) | 0.729 |
| Low-SD | Y **/** N | 406 (46.4) / 469 (53.6) | 293 (47.8) / 320 (52.2) | 113 (43.1) / 149 (56.9) | 0.205 |
| Low-VD | Y **/** N | 477 (54.5) / 398 (45.5) | 339 (55.3) / 274 (44.7) | 138 (52.7) / 124 (47.3) | 0.474 |
| High-IMAC | Y **/** N | 354 (40.5) / 521 (59.5) | 243 (39.6) / 370 (60.4) | 111 (42.4) / 151 (57.6) | 0.452 |
| High-VSR | Y **/** N | 453 (51.8) / 422 (48.2) | 322 (52.5) / 291 (47.5) | 131 (50.0) / 131 (50.0) | 0.493 |

Y, Yes; N, No; PLR, platelet-to-lymphocyte ratio; NLR, neutrophil-to-lymphocyte ratio; IBI, inflammatory burden index; SIRI, systemic inflammation response index; SII，systemic immune-inflammation index; PNI，prognostic nutritional index; SMI, skeletal muscle index; VATI, visceral adipose tissue index；SATI, subcutaneous adipose tissue index；TATI, total adipose tissue index； SMD, skeletal muscle density; SD, subcutaneous adipose density; VD, visceral adipose density；IMAC, intramuscular adipose tissue content; VSR, visceral to subcutaneous adipose tissue area ratio.

* P<0.05 was considered significant.
