# Supplementary material for: An Integrative Nutritional Model for Predicting Postoperative Complications in Locally Advanced Gastric Cancer After Radical Surgery and P-HIPEC
Source: Research Square preprint supplement (doi:10.21203/rs.3.rs-7112941/v1), 2025-08-27
Supplement: Supplementary file 4 [file 7682a881402a0d8e971c7b7f.docx]

TABLE 2. Clinical and pathological characteristics of the training set and validation set.

| Characteristic | Training set (n=613) | | P value | validation set (n=262) | | P value |
| --- | --- | --- | --- | --- | --- | --- |
| Complication  (n=153) | Without complication  (n=460) | Complication  (n=64) | Without complication  (n=198) |
| Sex, n (%)  Male **/** Female | 111 (72.5) **/** 42 (27.5) | 335 (72.8) **/** 125 (27.2) | 0.947 | 50 (78.1) **/** 14 (21.9) | 148 (74.7) **/** 50 (25.3) | 0.585 |
| Age (years)  ≤ 60 **/** > 60 | 13 (8.5) **/** 140 (91.5) | 182 (39.6) **/** 278 (60.4) | <0.001* | 12 (18.8) **/** 52 (81.3) | 81 (40.9) **/** 117 (59.1) | 0.001* |
| BMI (kg/m2)  <18.5   18.5-24.9  ≥ 25 | 12 (7.8)  89 (58.2)  52 (34.0) | 23 (5.0)  314 (68.3)  123 (26.7) | 0.063 | 3 (4.7)  44 (68.8)  17 (26.6) | 12 (6.1)  119 (60.1)  67 (33.8) | 0.463 |
| Smoking  Presence **/** Absence | 74 (48.4) **/** 79 (51.6) | 254 (55.2) **/** 206 (44.8) | 0.141 | 29 (45.3) **/** 35 (54.7) | 105 (53.0) **/** 93 (47.0) | 0.283 |
| Alcohol  Presence **/** Absence | 57 (37.3) **/** 96 (62.7) | 188 (40.9) **/** 272 (59.1) | 0.429 | 24 (37.5) **/** 40 (62.5) | 72 (36.4) **/** 126 (63.6) | 0.870 |
| NRS-2002，n (%)  < 3 **/** ≥ 3 | 36 (23.5) **/** 117 (76.5) | 233 (50.7) **/** 227 (49.3) | <0.001* | 16 (25.0) **/** 48 (75.0) | 88 (44.4) **/** 110 (55.6) | 0.006* |
| Hypertension，n (%)  Presence **/** Absence | 53 (34.6) **/** 100 (65.4) | 132 (28.7) **/** 328 (71.3) | 0.165 | 24 (37.5) **/** 40 (62.5) | 58 (29.3) **/** 140 (70.7) | 0.218 |
| T2-DM，n (%)  Presence **/** Absence | 45 (29.4) **/** 108 (70.6) | 44 (9.6) **/** 416 (90.4) | <0.001* | 12 (18.8) **/** 52 (81.3) | 19 (9.6) **/** 179 (90.4) | 0.049* |
| CCVD, n (%)  Presence **/** Absence | 81 (52.9) **/** 72 (47.1) | 129 (28.0) **/** 331 (72.0) | <0.001* | 33 (51.6) **/** 31 (48.4) | 61 (30.8) **/** 137 (69.2) | 0.003* |
| Respiratory disease1  Presence **/** Absence | 59 (38.6) **/** 94 (61.4) | 141 (30.7) **/** 319 (69.3) | 0.071 | 24 (37.5) **/** 40 (62.5) | 62 (31.3) **/** 136 (68.7) | 0.360 |
| Neoadjuvant chemotherapy  Presence **/** Absence | 20 (13.1) **/** 133 (86.9) | 58 (12.6) **/** 402 (87.4) | 0.882 | 9 (14.1) **/** 55 (85.9) | 26 (13.1) **/** 172 (86.9) | 0.849 |
| Pyloric obstruction  Presence **/** Absence | 38 (24.8) **/** 115 (75.2) | 113 (24.6) **/** 347 (75.4) | 0.946 | 16 (25.0) **/** 48 (75.0) | 48 (24.2) **/** 150 (75.8) | 0.902 |
| Abdominal operation history  Presence **/** Absence | 20 (13.1) **/** 133 (86.9) | 51 (11.1) **/** 409 (88.9) | 0.506 | 10 (15.6) **/** 54 (84.4) | 22 (11.1) **/** 176 (88.9) | 0.338 |
| Preoperative ASA score  I–II **/** III | 66 (43.1) **/** 87 (56.9) | 381 (82.8) **/** 79 (17.2) | <0.001* | 24 (37.5) **/** 40 (62.5) | 157 (79.3) **/** 41 (20.7) | <0.001* |
| Cycle of p-HIPEC  2 **/** 3 | 120 (78.4) **/** 33 (21.6) | 344 (74.8) **/** 116 (25.2) | 0.362 | 49 (76.6) **/** 15 (23.4) | 138 (69.7) **/** 60 (30.3) | 0.291 |
| Digestive tract reconstruction  Esophagogastric anastomosis  Esophagojejunostomy  Gastrojejunum Billroth II  Gastrojejunum Roux-en-Y | 7 (4.6)  57 (37.3)  46 (30.1)  43 (28.1) | 12 (2.6)  101 (22.0)  212 (46.1)  135 (29.3) | <0.001* | 4 (6.3)  25 (39.1)  17 (26.6)  18 (28.1) | 6 (3.0)  46 (23.2)  88 (44.4)  58 (29.3) | 0.021* |
| Operative approach  Open  Laparoscopic  Robotic | 10 (6.5)  125 (81.7)  18 (11.8) | 43 (9.3)  364 (79.1)  53 (11.5) | 0.562 | 4 (6.3)  52 (81.3)  8 (12.5) | 20 (10.1)  156 (78.8)  22 (11.1) | 0.637 |
| Operative duration, (min)  < 200 **/** ≥ 200 | 59 (38.6) **/** 94 (61.4) | 217 (47.2) **/** 243 (52.8) | 0.064 | 24 (37.5) **/** 40 (62.5) | 94 (47.5) **/** 104 (52.5) | 0.163 |
| Intraoperative blood loss (ml)  < 150 **/** ≥ 150 | 112 (73.2) **/** 41 (26.8) | 357 (77.6) **/** 103 (22.4) | 0.265 | 46 (71.9) **/** 18 (28.1) | 152 (76.8) **/** 46 (23.2) | 0.428 |
| Postoperative ICU admission  Presence **/** Absence | 38 (24.8) **/** 115 (75.2) | 61 (13.3) **/** 399 (86.7) | 0.001* | 19 (29.7) **/** 45 (70.3) | 34 (17.2) **/** 164 (82.8) | 0.030* |
| Tumor location  Upper  Middle  Lower  Multiple parts | 9 (5.9)  33 (21.6)  92 (60.1)  19 (12.4) | 16 (3.5)  92 (20.0)  308 (67.0)  44 (9.6) | 0.321 | 3 (4.7)  16 (25.0)  39 (60.9)  6 (9.4) | 8 (4.0)  35 (17.7)  131 (66.2)  24 (12.1) | 0.593 |
| Tumor size (cm)  < 6.45 **/** ≥ 6.45 | 104 (68.0) **/** 49 (32.0) | 343 (74.6) **/** 117 (25.4) | 0.112 | 43 (67.2) **/** 21 (32.8) | 148 (74.7) **/** 50 (25.3) | 0.237 |
| T stage  T3 **/** T4 | 42 (27.5) **/** 111 (72.5) | 133 (28.9) **/** 327 (71.1) | 0.729 | 18 (28.1) **/** 46 (71.9) | 56 (28.3) **/** 142 (71.7) | 0.981 |
| N stage  N0  N1  N2  N3 | 6 (3.9)  30 (19.6)  48 (31.4)  69 (45.1) | 17 (3.7)  83 (18.0)  150 (32.6)  210 (45.7) | 0.973 | 3 (4.7)  12 (18.8)  20 (31.3)  29 (45.3) | 11 (5.6)  32 (16.2)  57 (28.8)  98 (49.5) | 0.911 |
| LVI  Presence **/** Absence | 106 (69.3) **/** 47 (30.7) | 315 (68.5) **/** 145 (31.5) | 0.853 | 47 (73.4) **/** 17 (26.6) | 143 (72.2) **/** 55 (27.8) | 0.850 |
| Nerve invasion  Presence **/** Absence | 130 (85.0) **/** 23 (15.0) | 404 (87.8) **/** 56 (12.2) | 0.361 | 54 (84.4) **/** 10 (15.6) | 170 (85.9) **/** 28 (14.1) | 0.770 |
| CEA (ng/ml)  < 3.00 **/** ≥ 3.00 | 103 (67.3) **/** 50 (32.7) | 279 (60.7) **/** 181 (39.3) | 0.140 | 43 (67.2) **/** 21 (32.8) | 120 (60.6) **/** 78 (39.4) | 0.345 |
| AFP (ng/ml)  < 3.50 **/** ≥ 3.50 | 98 (64.1) **/** 55 (35.9) | 270 (58.7) **/** 190 (41.3) | 0.241 | 43 (67.2) **/** 21 (32.8) | 112 (56.6) **/** 86 (43.4) | 0.133 |
| CA199 (U/ml)  < 6.50 **/** ≥ 6.50 | 42 (27.5) **/** 111 (72.5) | 118 (25.7) **/** 342 (74.3) | 0.661 | 14 (21.9) **/** 50 (78.1) | 51 (25.8) **/** 147 (74.2) | 0.532 |

1obstructive emphysema, bronchial asthma, pneumonia, and pulmonary embolism

AFP, alpha fetoprotein; ASA, American society of Aneshesiologists, BMI, body mass index; CA199, Carbohydrate antigen199; CCVD, cardio-cerebral vascular disease; CEA, carcinoembryonic antigen; CVC, central venous catheter； ICU, intensive care unit; LVI, lymphovascular invasion; NRS-2002, nutrition risk screening 2002; p-HIPEC, prophylactic hyperthermic intraperitoneal chemotherapy; T2-DM, type 2 diabetes mellitus.

* P<0.05 was considered significant.
