# Supplementary material for: An Integrative Nutritional Model for Predicting Postoperative Complications in Locally Advanced Gastric Cancer After Radical Surgery and P-HIPEC
Source: Research Square preprint supplement (doi:10.21203/rs.3.rs-7112941/v1), 2025-08-27
Supplement: Supplementary file 5 [file 837eda20a9eddc267e692371.docx]

| High-PLR | ≥ 207.80 |
| --- | --- |
| High-NLR | ≥ 2.65 |
| High-IBI | ≥ 2.27 |
| High-SIRI | ≥ 0.99 |
| High-SII | ≥ 483.22 |
| High-PNI | ≥ 50.95 |
| Low-SMI | male: BMI<25kg/m2 and SMI<43 cm2/m2 or BMI≥25 kg/m2 and SMI<53 cm2/m2.  female: BMI<25 kg/m2 and SMI<41 cm2/m2 or BMI≥25 kg/m2 and SMI<41 cm2/m2. |
| Low-VATI | male: VATI<39.72 cm2/m2; female: VATI< 36.85 cm2/m2. |
| Low-SATI | male: SATI<36.44 cm2/m2; female: SATI<48.89 cm2/m2. |
| Low-TATI | male: TATI<80.34 cm2/m2; female: TATI<94.88 cm2/m2. |
| High-IMAC | male: IMAC≥-0.43; female: IMAC≥-0.35. |
| Low-SMD | BMI<25Kg/m2, SMD <41Hu; BMI≥25 Kg/m2, SMD < 33 Hu. |
| Low-SD | male: SD< -92.6 Hu; female: SD< -100.8Hu. |
| Low-VD | male: VD< -91.9 Hu; female: VD< -91.1 Hu. |
| High-VSR | male: VSR ≥1.02; female: VSR≥0.61. |

Supplementary table 4. The cut-off values of the Inflammatory nutritional markers and body composition parameters.

BMI, body mass index; PLR, platelet-to-lymphocyte ratio; NLR, neutrophil-to-lymphocyte ratio; IBI, inflammatory burden index; SIRI, systemic inflammation response index; SII，systemic immune-inflammation index; PNI，prognostic nutritional index; SMI, skeletal muscle index; VATI, visceral adipose tissue index；SATI, subcutaneous adipose tissue index；TATI, total adipose tissue index; Hu, Hounsfield unit; SMD, skeletal muscle density; SD, subcutaneous adipose density；VD, visceral adipose density; IMAC, intramuscular adipose tissue content; VSR, visceral to subcutaneous adipose tissue area ratio.
