# Supplementary material for: An Integrative Nutritional Model for Predicting Postoperative Complications in Locally Advanced Gastric Cancer After Radical Surgery and P-HIPEC
Source: Research Square preprint supplement (doi:10.21203/rs.3.rs-7112941/v1), 2025-08-27
Supplement: Supplementary file 6 [file e50e42197b82f4943691548e.docx]

Table 4. Univariate and multivariate analysis of prognostic factors related to POCs.

| Variables | Univariate analysis | Multivariate analysis |
| --- | --- | --- |
| OR (95% CI) P | OR (95% CI) P |
| age(years) (>65 vs. ≤65) | 7.050 (3.876-12.824) <0.001* | 3.645 (1.778-7.470) <0.001* |
| ASA grade (III vs. I+II) | 6.357 (4.256-9.497) <0.001* | 2.722 (1.614-4.590) <0.001* |
| T2-DM (Yes vs. No) | 3.939 (2.471-6.280) <0.001* | 1.706 (0.928-3.134) 0.085 |
| NRS-2002 (≥3 vs.<3) | 3.336 (2.201-5.056) <0.001* | 1.355 (0.785-2.337) 0.275 |
| CCVD (Yes vs. No) | 2.887 (1.980-4.209) <0.001* | 1.554 (0.928-2.603) 0.094 |
| Digestive tract reconstruction, n (%)  Gastrojejunum Roux-en-Y  Gastrojejunum Billroth II  Esophagogastric anastomosis  Esophagojejunostomy | 1(referent)  0.681 (0.426-1.088) 0.108  1.831 (0.678-4.945) 0.223  1.772 (1.105-2.842) 0.018* | 1(referent)  0.684 (0.372-1.256) 0.221  2.460 (0.693-8.727) 0.164  1.611 (0.859-3.021) 0.137 |
| SIRI (high SIRI vs. low SIRI) | 5.372 (3.605-8.004) <0.001* | 3.557 (2.167-5.837) <0.001* |
| PNI (high PNI vs. low PNI) | 0.273 (0.176-0.424) <0.001* | 0.433 (0.248-0.756) 0.003* |
| VSR (high VSR vs. low VSR) | 3.252 (2.175-4.861) <0.001* | 2.608 (1.573-4.325) <0.001* |
| SMI (cm2/kg) (low SMI vs. high SMI) | 5.484 (3.679-8.175) <0.001* | 4.422 (2.691-7.267) <0.001* |

ASA, American society of Aneshesiologists; CCVD, cardio-cerebral vascular disease; NRS-2002, nutrition risk screening 2002; SIRI, systemic inflammation response index; T2-DM, type 2 diabetes mellitus; PNI, prognostic nutritional index; SMI, skeletal muscle index; VSR, visceral to subcutaneous adipose tissue area ratio.

* P<0.05 was considered significant.
