# Supplementary material for: An Integrative Nutritional Model for Predicting Postoperative Complications in Locally Advanced Gastric Cancer After Radical Surgery and P-HIPEC
Source: Research Square preprint supplement (doi:10.21203/rs.3.rs-7112941/v1), 2025-08-27
Supplement: Supplementary file 7 [file f22734a8b169550ed0f397e8.docx]

TABLE 1. Clavien-Dindo classification of postoperative complications in the LAGC patients.

| Complications | All patients  N=875 | Training set  N=613 | Validation set  N=262 | P value |
| --- | --- | --- | --- | --- |
| **Infectious complications** |  |  |  |  |
| Pulmonary infection | 19 (2.2%) | 15 (2.4%) | 4 (1.5%) | 0.392 |
| Abdominal fluid and infection | 31 (3.5%) | 21 (3.4%) | 10 (3.8%) | 0.774 |
| Urinary abnormalities1 | 5 (0.6%) | 2 (0.3%) | 3 (1.1%) | 0.162 |
| Incision infection2 | 11 (1.3%) | 9 (1.5%) | 2 (0.8%) | 0.521 |
| **Vascular complications** |  |  |  |  |
| Pulmonary embolism | 3 (0.3%) | 1 (0.2%) | 2 (0.8%) | 0.215 |
| Lower limb thrombosis | 17 (1.9%) | 11 (1.8%) | 6 (2.3%) | 0.627 |
| Cerebral infarction | 2 (0.2%) | 2 (0.3%) | 0 | 0.580 |
| **Digestive system-related complications** |  |  |  |  |
| Anastomotic fistula/stenosis | 18 (2.1%) | 14 (2.3%) | 4 (1.5%) | 0.470 |
| Anastomotic hemorrhage | 10 (1.1%) | 8 (1.3%) | 2 (0.8%) | 0.732 |
| Delayed gastric emptying | 12 (1.4%) | 7 (1.1%) | 5 (1.9%) | 0.526 |
| Intestinal obstruction | 9 (1.0%) | 5 (0.8%) | 4 (1.5%) | 0.464 |
| Recurrent vomiting and abdominal pain | 6 (0.7%) | 5 (0.8%) | 1 (0.4%) | 0.675 |
| **Organ dysfunction** |  |  |  |  |
| Respiratory failure | 8 (0.9%) | 5 (0.8%) | 3 (1.1%) | 0.702 |
| Circulatory dysfunction3 | 12 (1.4%) | 9 (1.5%) | 3 (1.1%) | 0.768 |
| Acute kidney injury | 3 (0.3%) | 1 (0.2%) | 2 (0.8%) | 0.215 |
| **Other complications** |  |  |  |  |
| Pleural effusion | 14 (1.6%) | 11 (1.8%) | 3 (1.1%) | 0.572 |
| Hypoproteinemia | 27 (3.1%) | 21 (3.4%) | 6 (2.3%) | 0.374 |
| Abdominal hemorrhage | 7 (0.8%) | 6 (1.0%) | 1 (0.4%) | 0.454 |
| Metabolite or electrolyte imbalance4 | 3 (0.3%) | 1 (0.2%) | 2 (0.8%) | 0.215 |
| Clavien-Dindo |  |  |  |  |
| II | 145 (16.6%) | 106 (17.3%) | 39 (14.9%) | 0.381 |
| III | 41 (4.7%) | 29 (4.7%) | 12 (4.6%) | 0.923 |
| IV | 26 (3.0%) | 16 (2.6%) | 10 (3.8%) | 0.336 |
| V | 5 (0.6%) | 3 (0.5%) | 2 (0.8%) | 0.639 |
| Overall postoperative complications  (Clavien-Dindo grade ≥ II), n (%) | 217 (24.8%) | 154 (25.1%) | 63 (24.0%) | 0.736 |
| Severe postoperative complications  (Clavien-Dindo grade ≥ III), n (%) | 72 (8.2%) | 48 (7.8%) | 24 (9.2%) | 0.512 |

1Urinary tract infection, dysuria, etc.

2Surgical incision infection or fat liquefaction.

3Postoperative ventricular fibrillation, persistent atrial fibrillation, myocardial infarction, heart failure, cardiac shock.

4Persistent electrolyte disturbance or hyperglycemia, abnormal liver and kidney function, etc.

* P<0.05 was considered significant.
