# Supplementary material for: An Integrative Nutritional Model for Predicting Postoperative Complications in Locally Advanced Gastric Cancer After Radical Surgery and P-HIPEC
Source: Research Square preprint supplement (doi:10.21203/rs.3.rs-7112941/v1), 2025-08-27
Supplement: Supplementary file 8 [file f83623532730f0148724ca74.docx]

Supplementary table 1 The Clavien-Dindo classification of surgical complications.

| Grades | Definition |
| --- | --- |
| Grade I | Clinical symptoms caused by common postoperative causes that did not require drug, surgical, or endoscopic radiation interventions and non-life-threatening complications necessitating administration of antiemetics, antipyretics, analgesics, electrolyte-balancing medications, and physical therapy. Additionally, bedside open infected incisions were included |
| Grade II | Potentially life-threatening complications requiring pharmacological treatment with drugs other than such allowed for grade I complications, including blood transfusions and total parenteral nutrition. |
| Grade III  IIIa  IIIb | Complications leading to persistent disability or organ resection and requiring surgical, endoscopic, radiological and interventional approaches.  Intervention not under general anesthesia.  Intervention under general anesthesia, such as anastomotic leakage requiring an unplanned reoperation. |
| Grade IV  IVa  IVb | Life-threatening complications requiring intensive care unit (ICU) management, including central nervous system complications.  Single organ dysfunction, including dialysis.  Multiple organ dysfunction. |
| Grade V | Death. |
