# Supplementary figures and images for: An Integrative Nutritional Model for Predicting Postoperative Complications in Locally Advanced Gastric Cancer After Radical Surgery and P-HIPEC
Source: Research Square preprint supplement (doi:10.21203/rs.3.rs-7112941/v1), 2025-08-27

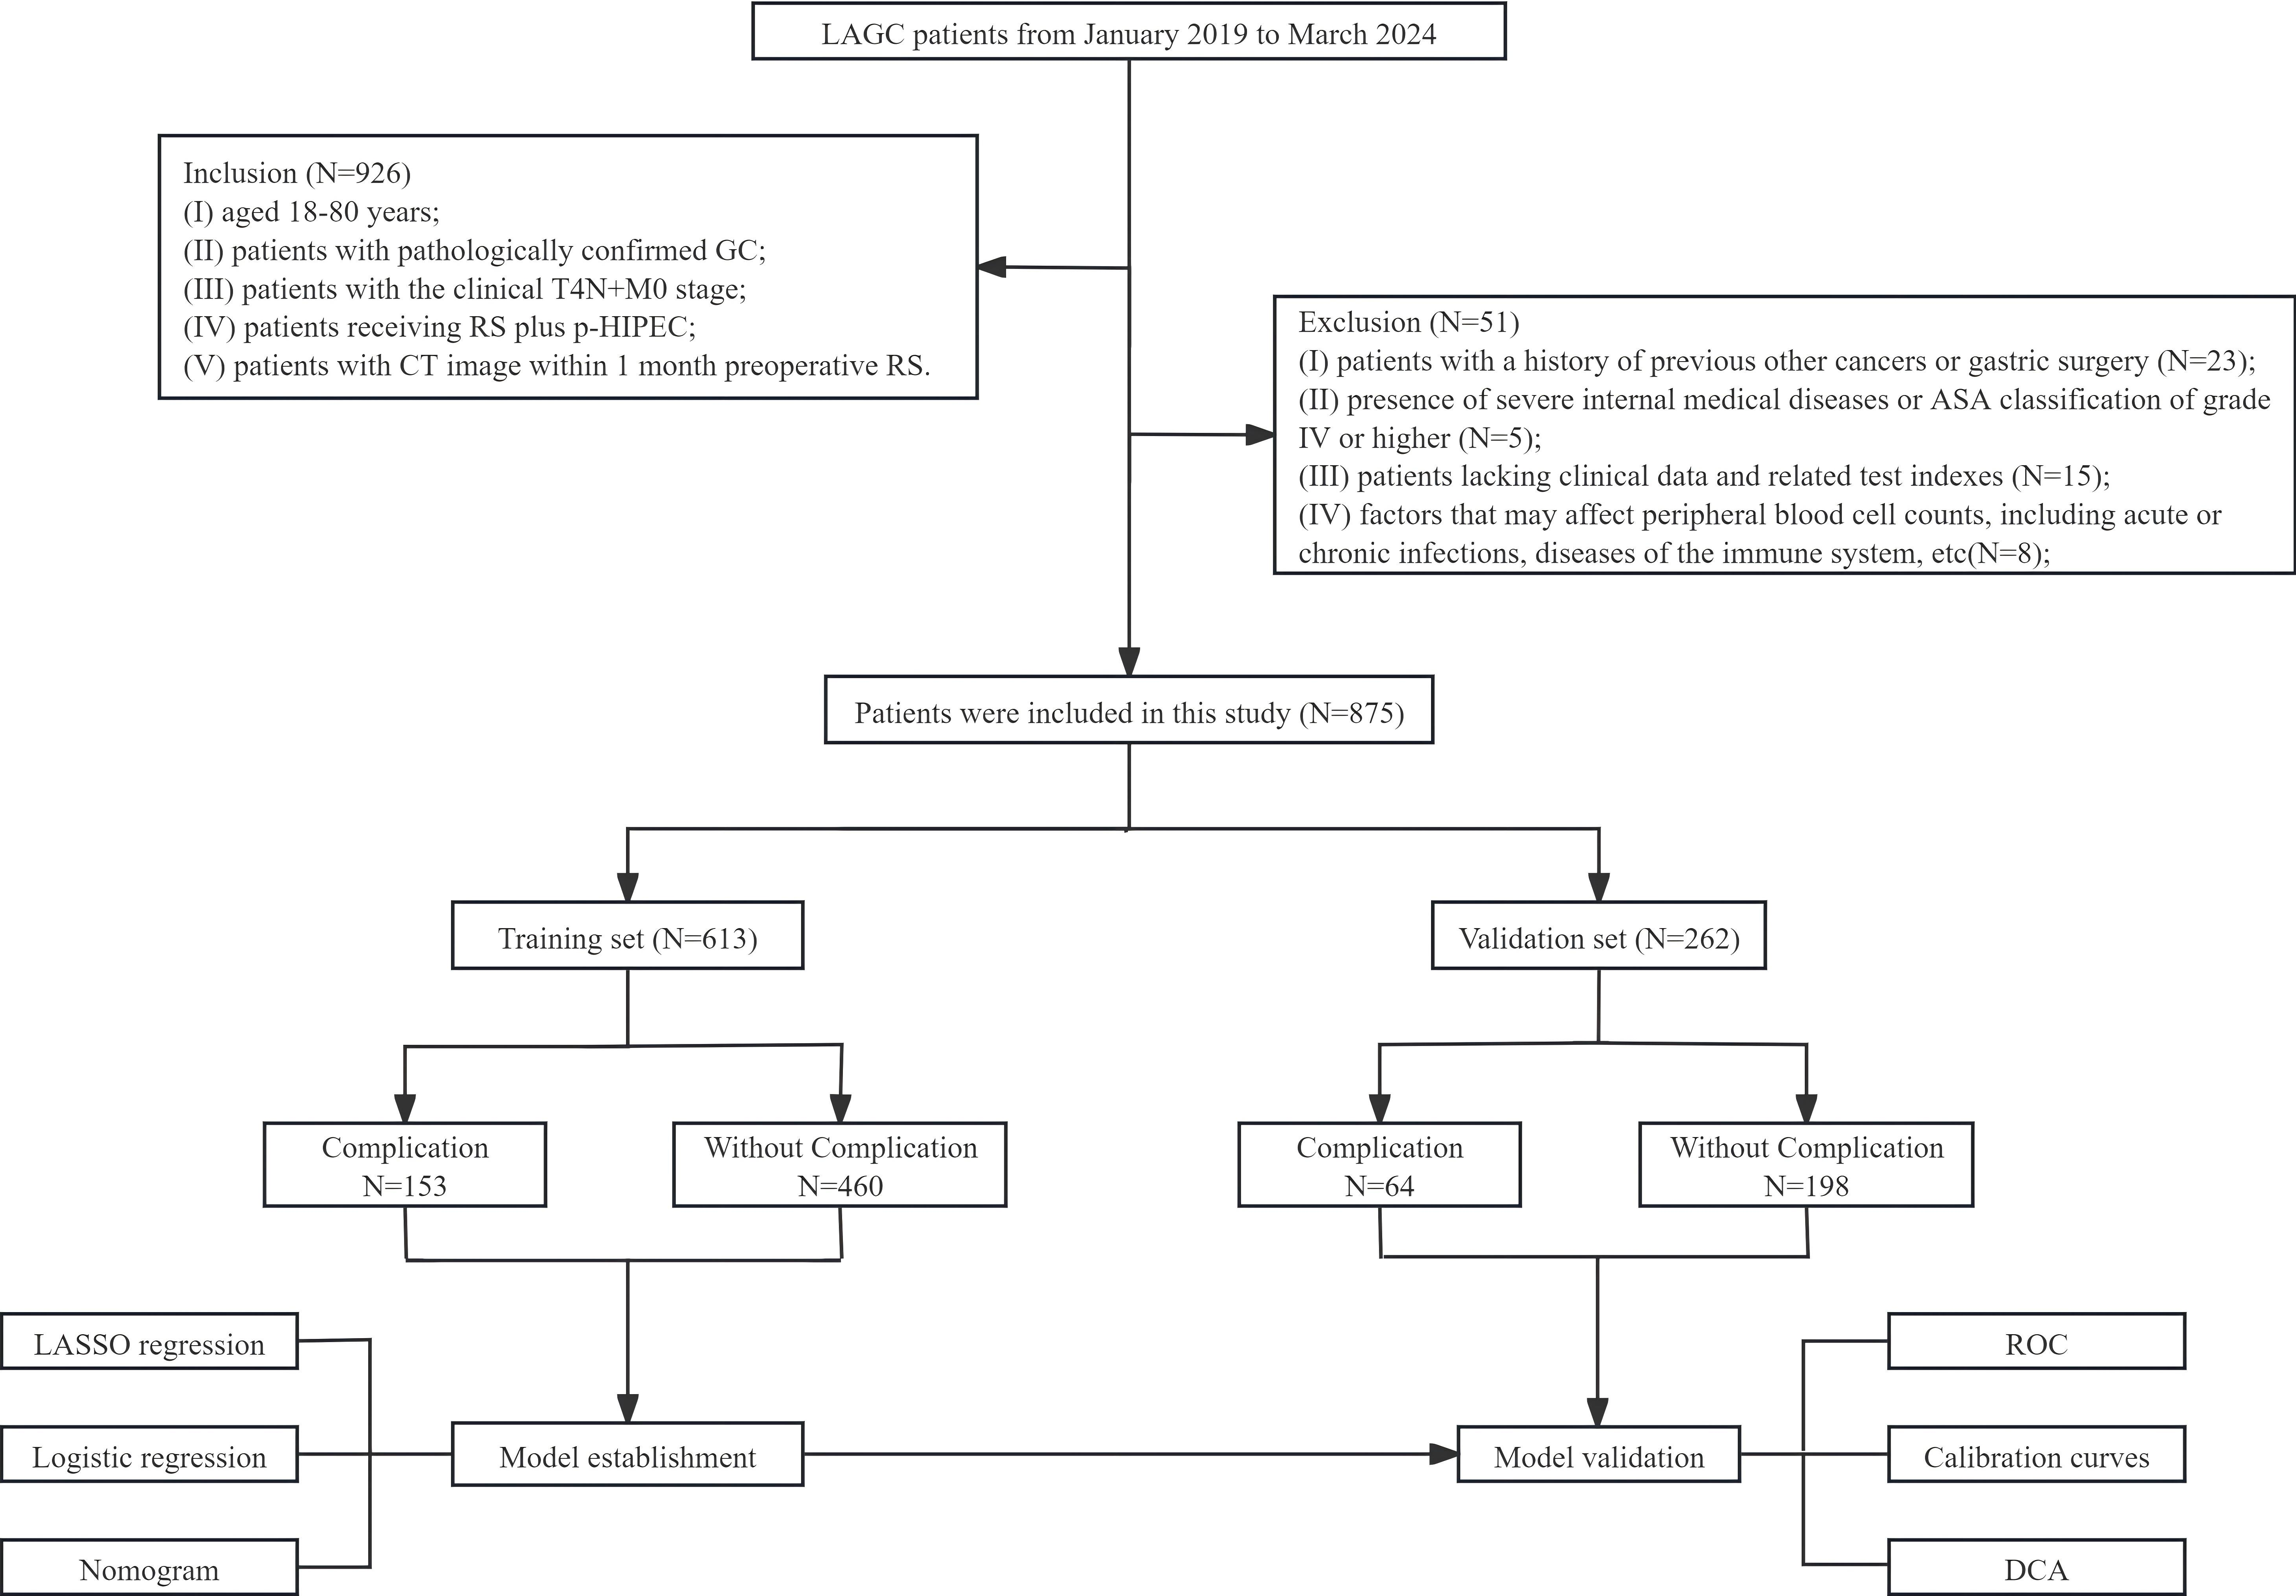

Supplement: Supplementary file 1 [file 86c9a664929b747b480e4c32.pdf]
